# Supplementary material for: Heteropentanuclear Oxalato-Bridged nd–4f (n=4, 5) Metal Complexes with NO Ligand: Synthesis, Crystal Structures, Aqueous Stability and Antiproliferative Activity
Source: PubMed Central journal article supplement (PMC4583781; doi:10.1002/chem.201502026), 2015-08-10
Supplement: chem0021-13703-sd1.pdf [file chem0021-13703-sd1.pdf]

# CHEMISTRY

## A **European** Journal

### Supporting Information

#### **Heteropentanuclear Oxalato-Bridged $nd-4f$ ( $n = 4, 5$ ) Metal Complexes with NO Ligand: Synthesis, Crystal Structures, Aqueous Stability and Antiproliferative Activity**

Paul-Steffen Kuhn,<sup>[a]</sup> Laura Cremer,<sup>[a]</sup> Anolie Gavriluta,<sup>[b]</sup> Katarina K. Jovanović,<sup>[c]</sup> Lana Filipović,<sup>[c]</sup> Alfred A. Hummer,<sup>[d]</sup> Gabriel E. Büchel,<sup>[a, g]</sup> Biljana P. Dojčinović,<sup>[f]</sup> Samuel M. Meier,<sup>[e]</sup> Annette Rompel,<sup>[d]</sup> Siniša Radulović,<sup>[c]</sup> Jean Bernard Tommasino,<sup>[b]</sup> Dominique Luneau,<sup>\*[b]</sup> and Vladimir B. Arion<sup>\*[a]</sup>

chem\_201502026\_sm\_miscellaneous\_information.pdf

## Table of Contents

**Figure S1.** Phosphorescence emission spectrum of complex **4**.

**Figure S2.** Structural formulas of the model compounds.

**Figure S3.** UV–vis spectra of **5** (0.35 mM) in aqueous solution measured directly after dissolution (black dashed trace) and 96 h thereafter (red trace).

**Figure S4.** UV–vis spectrum of **9** (0.34 mM) in aqueous solution measured directly after dissolution (black line) and 96 h thereafter (red line).

**Figure S5.** Concentration-effect curves of complexes **1–9**.

**Table S1.** Unit cell parameters for **3** and **4**.

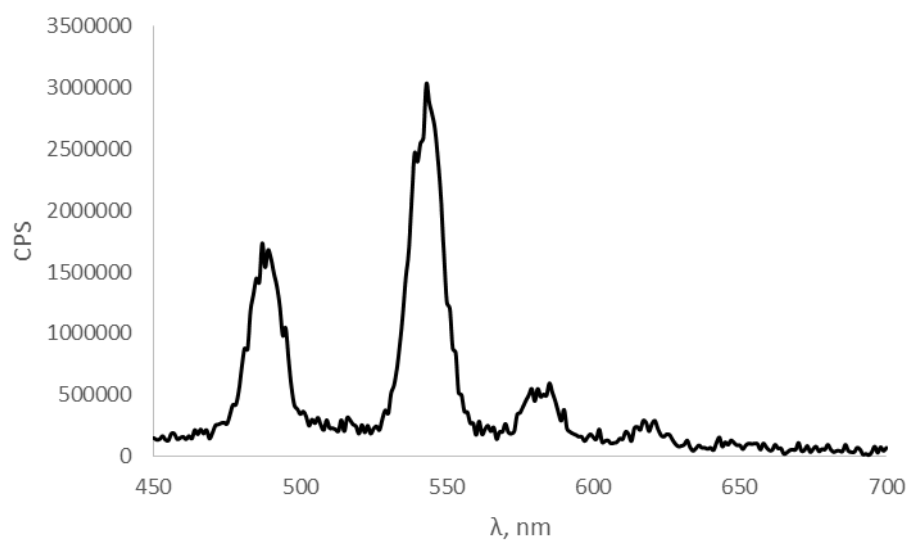

**Figure S1.** Phosphorescence emission spectrum ( $\lambda_{\text{ex}} = 365$  nm) of complex **4**.

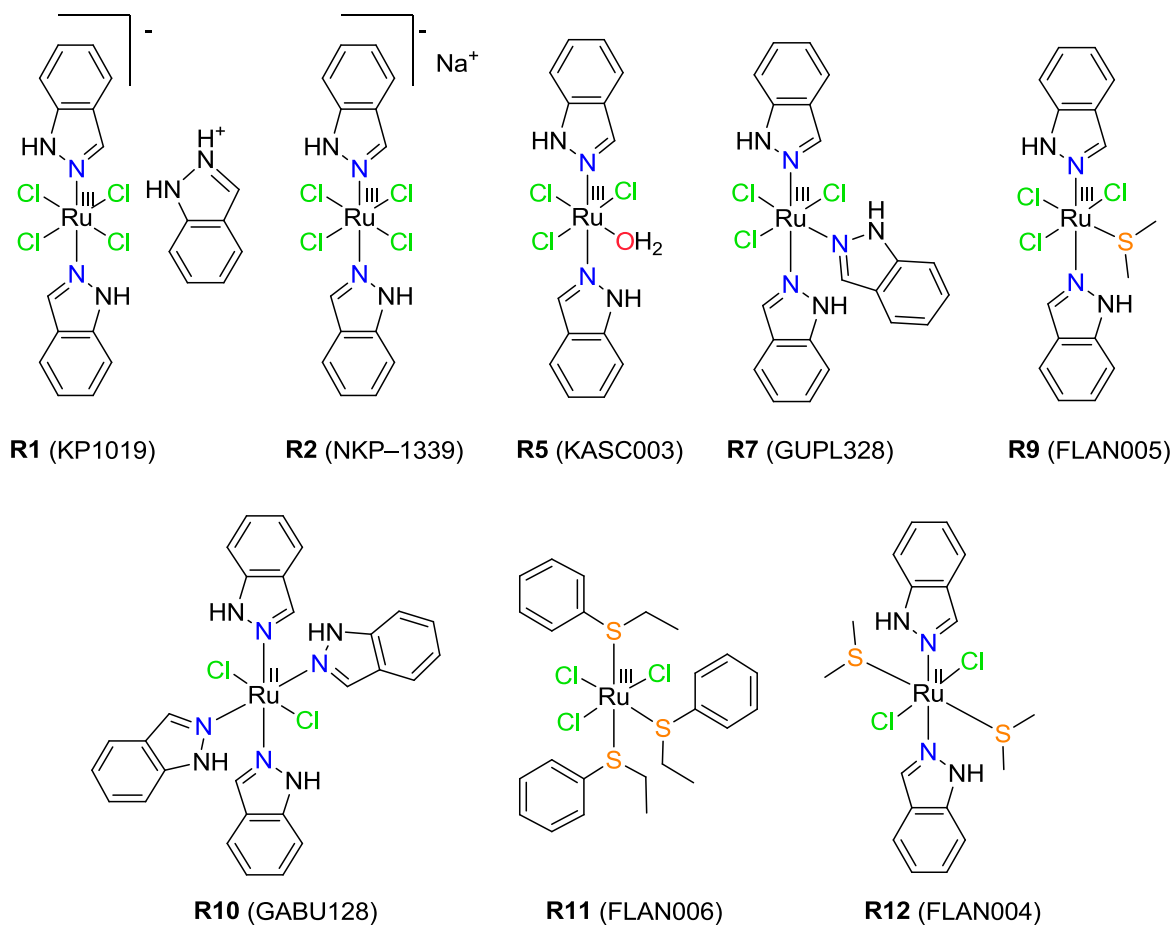

**Figure S2.** Structural formulas of the model compounds.

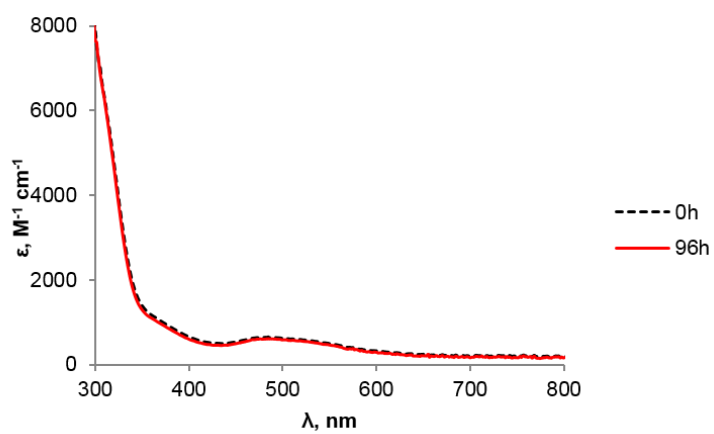

**Figure S3.** UV-vis spectra of **5** (0.35 mM) in aqueous solution measured directly after dissolution (black dashed trace) and 96 h thereafter (red trace).

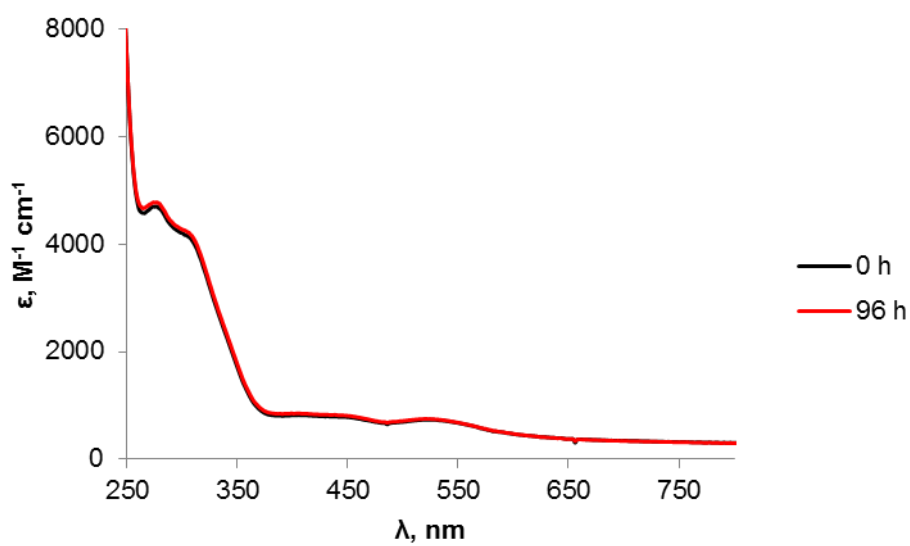

**Figure S4.** UV-vis spectrum of **9** (0.34 mM) in aqueous solution measured directly after dissolution (black line) and 96 h thereafter (red line).

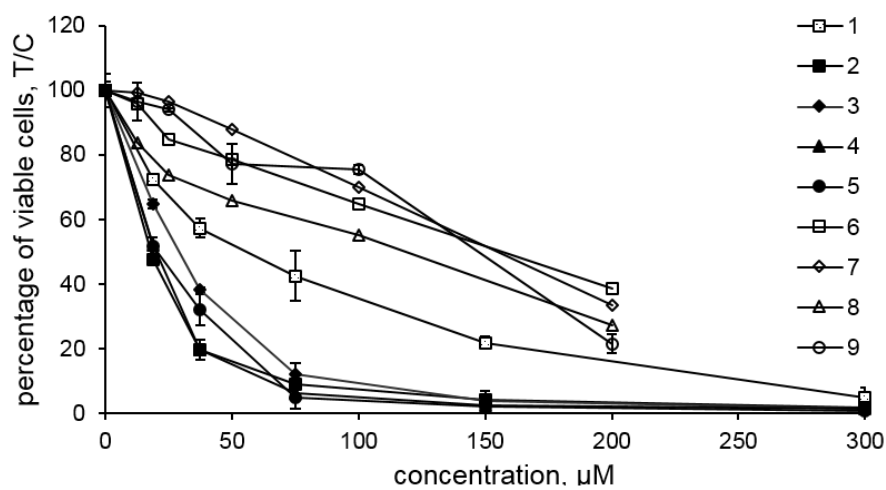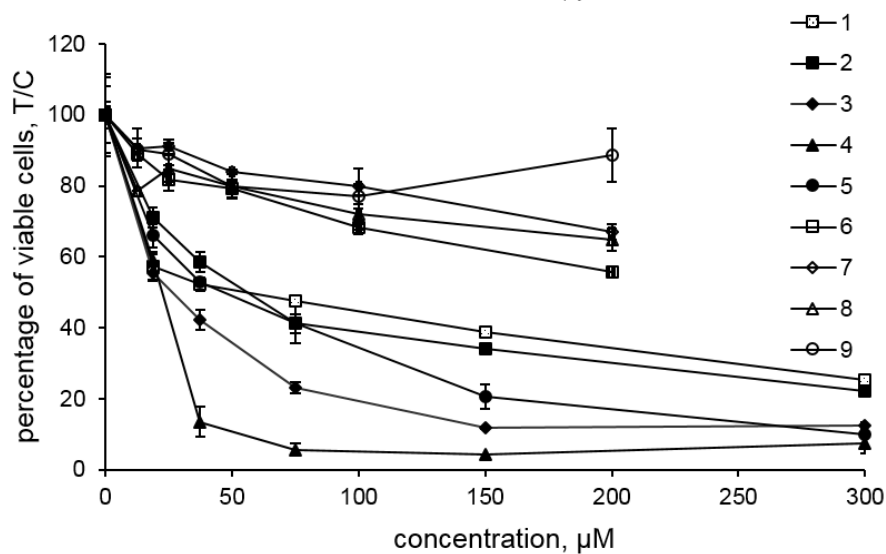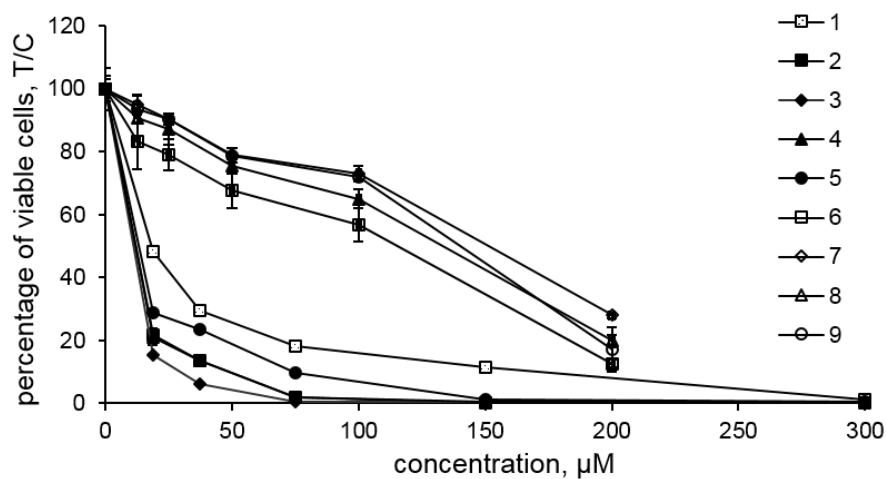

**Figure S5.** Concentration-effect curves of complexes 1–9 in the two human cancer cell lines HeLa and A549 and in the noncancerous cell line MRC-5, obtained by the MTT assay (48 h exposure).

**Table S1.** Crystal parameters for **3**, **4** and **4'**.

| Compound     | <b>3</b>  | <b>4</b>  | <b>4'</b>                |
|--------------|-----------|-----------|--------------------------|
| Space group  | <i>Cc</i> | <i>Cc</i> | <i>P-42<sub>1</sub>c</i> |
| $a$ , Å      | 17.9318   | 18.0098   | 18.4046                  |
| $b$ , Å      | 27.1662   | 27.233    | 18.4046                  |
| $c$ , Å      | 26.8678   | 26.9135   | 18.4366                  |
| $\alpha$ , ° |           |           |                          |
| $\beta$ , °  | 92.721    | 92.529    |                          |
| $\gamma$ , ° |           |           |                          |
